# Supplementary material
Source: PubMed Central journal article supplement (PMC6033647)
Supplement: NIHMS934873-supplement-Supp_info.pdf [file NIHMS934873-supplement-Supp_info.pdf]

**Supplementary Materials**

**Recombinant Relaxin Protects Liver Transplants from Ischemia Damage via  
Hepatocyte Glucocorticoid Receptor: From Bench-to-Bedside**

Shoichi Kageyama<sup>1\*</sup>, Kojiro Nakamura<sup>1\*</sup>, Takehiro Fujii<sup>1</sup>, Bibo Ke<sup>1</sup>, Rebecca A Sosa<sup>2</sup>,  
Elaine F. Reed<sup>2</sup>, Nakul Datta<sup>1</sup>, Ali Zarrinpar<sup>1^</sup>, Ronald W. Busuttil<sup>1</sup>,  
Jerzy W. Kupiec-Weglinski<sup>1</sup>

<sup>1</sup>The Dumont-UCLA Transplant Center, Department of Surgery, Division of Liver and  
Pancreas Transplantation; <sup>2</sup>Department of Pathology and Laboratory Medicine, David  
Geffen School of Medicine at University of California, Los Angeles, CA 90095

|                                    |          |
|------------------------------------|----------|
| <b>Supplementary figure 1.....</b> | <b>2</b> |
| <b>Supplementary figure 2.....</b> | <b>3</b> |
| <b>Supplementary figure 3.....</b> | <b>4</b> |
| <b>Supplementary figure 4.....</b> | <b>5</b> |
| <b>Supplementary figure 5.....</b> | <b>6</b> |
| <b>Supplementary table 1.....</b>  | <b>7</b> |
| <b>Supplementary table 2.....</b>  | <b>8</b> |

Fig. S1

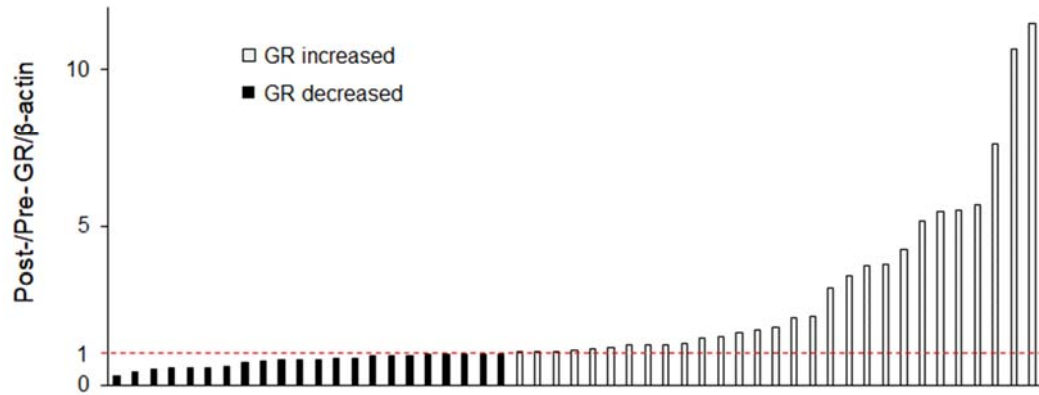**Fig. S1: Peri-transplant GR expression in human OLT.**

Pre-transplant and post-transplant liver biopsy (Bx) samples were collected from fifty-one OLTs. Bx samples were analyzed by Western blots with  $\beta$ -actin normalization and post-/pre-transplant GR ratio was calculated.

Fig. S2

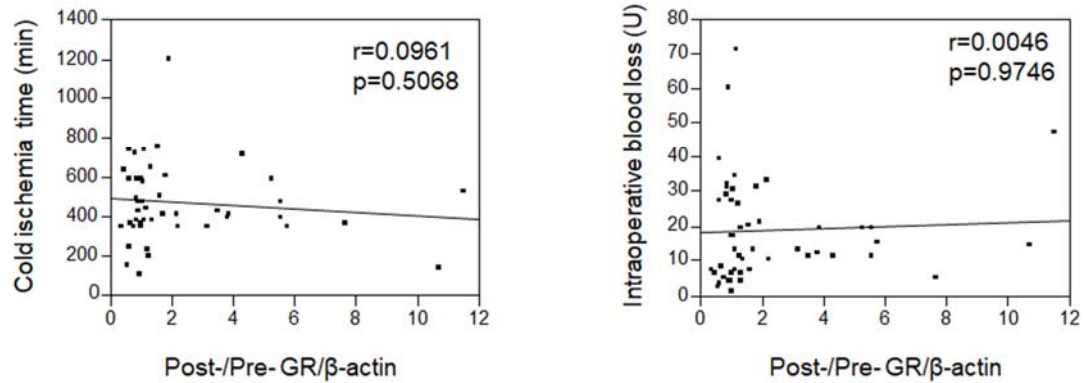

**Figure S2: Correlation between peri-transplant GR increase in human OLT and cold ischemia time/intraoperative blood loss.**

Post-/pre-transplant GR ratio was calculated from fifty-one clinical OLT cases and relationship with cold ischemia time and intraoperative blood loss was analyzed.  $r$ : Spearman's correlation coefficient.

Fig. S3

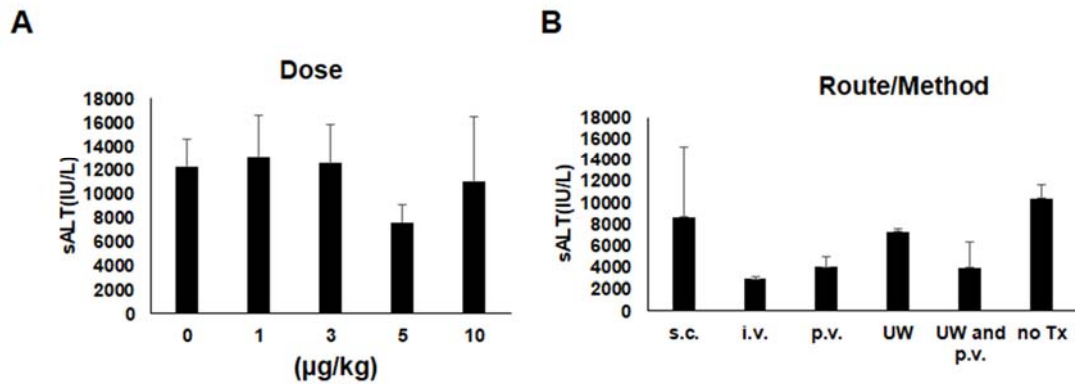

**Figure S3: rhRLX dose-response and route of administration in a mouse IRI-OLT model.**

Donor mouse (C57/Bl6) livers subjected to 18h of cold storage were transplanted to recipient mice. Serum ALT levels were analyzed at 6h of reperfusion. Groups of OLT recipients were treated with **(A)** increasing rhRLX doses (0 - 10µg/kg, iv) at time of reperfusion; **(B)** optimal rhRLX dose (5µg/kg) by different route (s.c., subcutaneous; i.v., intravenous; p.v., portal vein; UW, rhRLX supplement in UW during cold storage; no Tx, no treatment). Mean±SD are shown (n=2/group).

Fig. S4

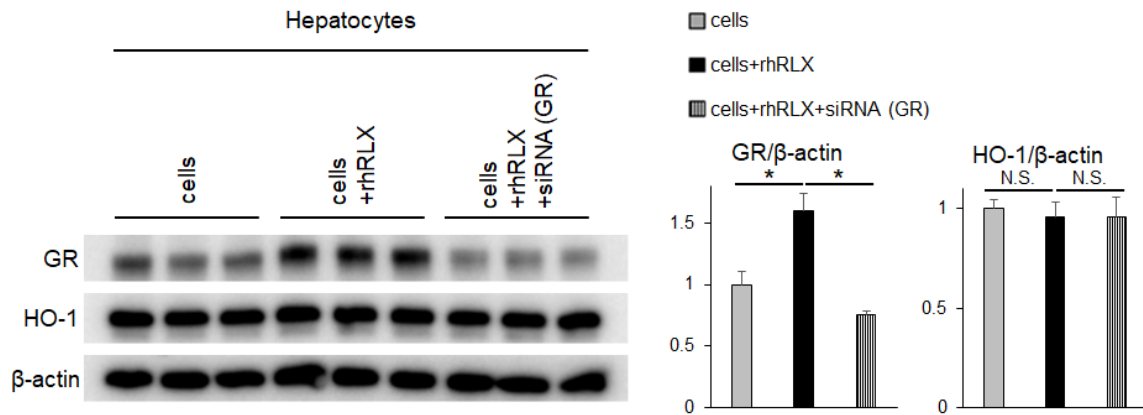

**Figure S4: Neither rhRLX treatment nor GR knockdown by siRNA affects HO-1 expression in cultured hepatocytes.**

Primary mouse hepatocytes were treated with or without rhRLX (1 $\mu$ g/ml; 24h) and siRNA against GR. Western blot-assisted detection and relative intensity ratio of GR and HO-1.  $\beta$ -actin expression served as an internal control and used for normalization (n=3/group). Data are shown as means $\pm$ SD. \*p<0.05, N.S.: not significant (Student t-test).

Fig. S5

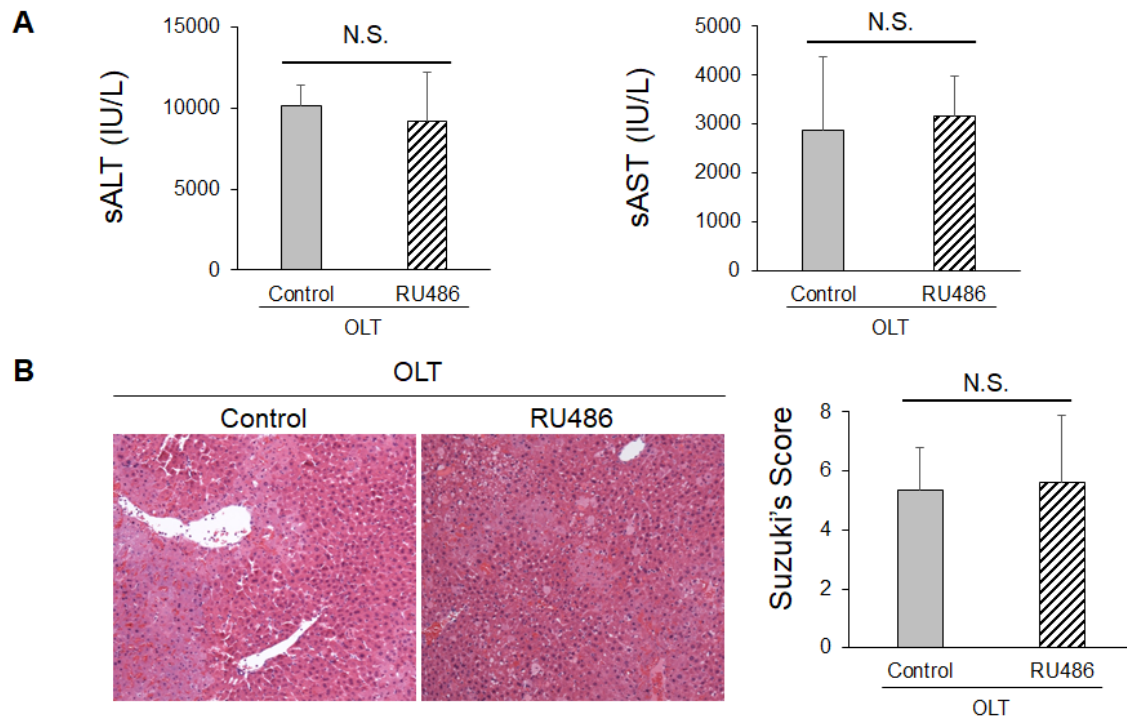

**Figure S5: RU486 pretreatment alone does not affect IRI severity in mouse OLT.**

Mouse livers were transplanted to syngeneic recipients with or without pre-incubation with UW containing GR antagonist (RU-486, 500nM) for 18h during cold storage. (A) Serum ALT and AST levels (IU/L, n=4-5/group). (B) Representative hematoxylin and eosin staining (original magnification, x100) and Suzuki's histological IRI grading (n=4-5/group). Data shown as mean±SD. N.S.: not significant (Student t-test).

Table S1: Primer Sequences Used for Real-Time Quantitative PCR

| Gene         | Forward                      | Reverse                       |
|--------------|------------------------------|-------------------------------|
| TLR4         | 5'-GGACTCTGATCATGGCACTG-3'   | 5'-CTGATCCATGCATTGGTAGGT-3'   |
| RAGE         | 5'-GGACCCTTAGCTGGCACTTAGA-3' | 5'-GAGTCCCCTCTCAGGGTGTCT-3'   |
| IL1 $\beta$  | 5'-TGTAATGAAAGACGGCACACC-3'  | 5'-TCTTCTTTGGGTATTGCTTGG-3'   |
| CCL2         | 5'-CATCCACGTGTTGGCTCA-3'     | 5'-GATCATCTTGCTGGTGAATGAGT-3' |
| CXCL10       | 5'-GCTGCCGTCATTTTCTGC-3'     | 5'-TCTCACTGGCCCGTCATC-3'      |
| TNF $\alpha$ | 5'-GCCTCTTCTCATTCTGCTTGT-3'  | 5'-GATGATCTGAGTGTGAGGGTCTG-3' |
| CXCL1        | 5'-ACCCAAACCGAAGTCATAG-3'    | 5'-TTGTATAGTGTTCAGAAAGC-3'    |
| CXCL2        | 5'-ACTTCAAGAACATCCAGAG-3'    | 5'-CTTCCAGGTCAGTTAGC-3'       |
| HPRT         | 5'-TCAACGGGGGACATAAAAGT-3'   | 5'-TGCATTGTTTTACCAGTGTCAA-3'  |

Table S2

| Donor                     | $\Delta$ GR-low (n=26)                            | $\Delta$ GR-high (n=25) | p value |
|---------------------------|---------------------------------------------------|-------------------------|---------|
| Age (years)               | 37.5 (13-67)                                      | 47 (19-74)              | p=0.20  |
| Gender (M/F)              | 11/15                                             | 11/13                   | p=0.57  |
| Weight (kg)               | 70.5 (47.2-106.0)                                 | 81.9 (52.3-127)         | p=0.16  |
| BMI (kg/m <sup>2</sup> )  | 25.4 (19.6-34.9)                                  | 27.0 (19.7-42.6)        | p=0.06  |
| Pre-transplant ALT (IU/L) | 26.5 (11-403)                                     | 22.5 (8-887)            | p=0.07  |
| Pre-transplant AST (IU/L) | 44.5 (14-360)                                     | 26 (10-749)             | p=0.36  |
| Cold Ischemic Time (min)  | 465 (120-750)                                     | 420 (150-1213)          | p=0.94  |
| Donation status           | All of the donors were donation after brain death |                         |         |

| Recipient                          | $\Delta$ GR-low (n=26) | $\Delta$ GR-high (n=25) | p value |
|------------------------------------|------------------------|-------------------------|---------|
| Age (years)                        | 59 (23-73)             | 59 (30-73)              | p=0.76  |
| Gender (M/F)                       | 20/6                   | 17/8                    | p=0.54  |
| Weight (kg)                        | 83.5 (51.3-151.6)      | 79.6 (36.0-146.1)       | p=0.27  |
| BMI (kg/m <sup>2</sup> )           | 28.6 (17.8-44.3)       | 25.6 (14.5-47.5)        | p=0.41  |
| Disease etiology                   |                        |                         | p=1.00  |
| Alcohol                            | 4                      | 5                       |         |
| HCV                                | 10                     | 10                      |         |
| NASH                               | 3                      | 2                       |         |
| other                              | 9                      | 8                       |         |
| HCC (with/without)                 | 10/16                  | 10/15                   | p=1.00  |
| ABO                                |                        |                         | p=0.11  |
| identical                          | 22                     | 25                      |         |
| compatible                         | 4                      | 0                       |         |
| MELD score                         | 30.5 (9-44)            | 33 (17-42)              | p=0.19  |
| Intraoperative blood loss (U)      | 18 (2-72)              | 14 (5-48)               | p=0.98  |
| Pre-transplant ALT (IU/L)          | 52.5 (9-6168)          | 36 (11-617)             | p=0.54  |
| Pre-transplant AST (IU/L)          | 63 (22-6967)           | 74 (25-283)             | p=0.70  |
| Pre-operative hospital stay (days) | 1 (0-33)               | 9 (0-78)                | p=0.11  |
| Pre-operative ICU stay (days)      | 0 (0-32)               | 3 (0-54)                | p=0.14  |

**Table S2. Donor and recipient demographics.**

Pre- and post-transplant liver biopsy samples were collected from fifty-one human liver transplantation cases and analyzed by Western-blot. Peri-operative GR increase was determined by calculating post-/pre- GR expression ( $\Delta$ GR), and then 51 cases were divided into  $\Delta$ GR-low (<1.1, n=26) or  $\Delta$ GR-high (>1.1, n=25) groups. Correlations between donor and recipient demographic parameters and peri-transplant  $\Delta$ GR were analyzed using Fisher's exact test for categorical variables and Mann-Whitney U test for continuous values. Values are expressed as median (range).
